# Supplementary material
Source: publisher figshare collection journal article supplement (https://sage.figshare.com/ndownloader/files/16407065)
Supplement: Supplementary file 1 [file 16407065]

# Appendix 6: R code listings for example

## MGF method

# Load necessary libraries

library(tidyverse)

library(flexsurv)

# [... Define parameters ...]

# Probability density and cumulative distribution functions

f_X1_treatment <- function(x) dweibull(x, scale = lambda_treatment, shape = k1)

F_X1_treatment <- function(x) pweibull(x, scale = lambda_treatment, shape = k1)

f_X1_control <- function(x) dweibull(x, scale = lambda_control, shape = k1)

F_X1_control <- function(x) pweibull(x, scale = lambda_control, shape = k1)

f_X2 <- function(x) dgompertz(x, rate = b2, shape = a2)

F_X2 <- function(x) pgompertz(x, rate = b2, shape = a2)

#' Convenience function for calculating discounted QALYs accrued between A and B

#'

#' @param mgf_a_0 M_A^(0)(-r)

#' @param mgf_a_1 M_A^(1)(-r)

#' @param mgf_a_2 M_A^(2)(-r)

#' @param mgf_b_0 M_B^(0)(-r)

#' @param mgf_b_1 M_B^(1)(-r)

#' @param mgf_b_2 M_B^(2)(-r)

MGF_qaly <- function(mgf_a_0, mgf_a_1, mgf_a_2, mgf_b_0, mgf_b_1, mgf_b_2) {

((

(u0*mgf_a_0 + u1*mgf_a_1 + u2*mgf_a_2)*r^2 +

(u1*mgf_a_0 + 2*u2*mgf_a_1)*r +

(2*u2*mgf_a_0)

) - (

(u0*mgf_b_0 + u1*mgf_b_1 + u2*mgf_b_2)*r^2 +

(u1*mgf_b_0 + 2*u2*mgf_b_1)*r +

(2*u2*mgf_b_0)

))/r^3

}

# Calculate probability X1 < X2 given receive treatment

p_treatment <- integrate(

function(x) { f_X2(x)*F_X1_treatment(x) },

lower = 0,

upper = Inf,

rel.tol = 1e-8

)$value

# Calculate probability X1 < X2 given receive control

p_control <- integrate(

function(x) { f_X2(x)*F_X1_control(x) },

lower = 0,

upper = Inf,

rel.tol = 1e-8

)$value

# Calculate EMGFs for all variables with j = 0, 1, 2

GM_X1_treatment <- map_dbl(

0:2,

~ integrate(

function(x) { x^(.)*exp(-r*x) * f_X1_treatment(x) * (1-F_X2(x)) / p_treatment },

lower = 0,

upper = Inf,

rel.tol = 1e-8

)$value

)

GM_X1_control <- map_dbl(

0:2,

~ integrate(

function(x) { x^(.)*exp(-r*x) * f_X1_control(x) * (1-F_X2(x)) / p_control },

lower = 0,

upper = Inf,

rel.tol = 1e-8

)$value

)

GM_X2_treatment <- map_dbl(

0:2,

~ integrate(

function(x) { x^(.)*exp(-r*x) * f_X2(x) * (1-F_X1_treatment(x)) / (1-p_treatment) },

lower = 0,

upper = Inf,

rel.tol = 1e-8

)$value

)

GM_X2_control <- map_dbl(

0:2,

~ integrate(

function(x) { x^(.)*exp(-r*x) * f_X2(x) * (1-F_X1_control(x)) / (1-p_control) },

lower = 0,

upper = Inf,

rel.tol = 1e-8

)$value

)

GM_X3 <- map_dbl(

0:2,

~ integrate(

function(x) { x^(.)*exp(-r*x) * dlnorm(x, meanlog = mu3, sdlog = sigma3) },

lower = 0,

upper = Inf,

rel.tol = 1e-8

)$value

)

# Combine EMGFs to calculate costs and QALYs

MGF <- data.frame(

arm = factor(c("Treatment", "Control")),

cost_stable = c(

c_treatment / r * (1 - p_treatment*GM_X1_treatment[1] - (1-p_treatment)*GM_X2_treatment[1]),

c_control / r * (1 - p_control*GM_X1_control[1] - (1-p_control)*GM_X2_control[1])

),

cost_progression = c(p_treatment, p_control) * c_progression *

c(GM_X1_treatment[1], GM_X1_control[1]),

cost_death = c_death * c(

p_treatment * GM_X1_treatment[1] * GM_X3[1] + (1-p_treatment) * GM_X2_treatment[1],

p_control * GM_X1_control[1] * GM_X3[1] + (1-p_control) * GM_X2_control[1]

),

cost_progressive = c(p_treatment, p_control) * c_pd / r *

c(GM_X1_treatment[1], GM_X1_control[1]) * (1 - GM_X3[1]),

QALY_stable = v_sd*c(

p_treatment*MGF_qaly(1, 0, 0, GM_X1_treatment[1], GM_X1_treatment[2], GM_X1_treatment[3]) +

(1-p_treatment)*MGF_qaly(1, 0, 0, GM_X2_treatment[1], GM_X2_treatment[2], GM_X2_treatment[3]),

p_control*MGF_qaly(1, 0, 0, GM_X1_control[1], GM_X1_control[2], GM_X1_control[3]) +

(1-p_control)*MGF_qaly(1, 0, 0, GM_X2_control[1], GM_X2_control[2], GM_X2_control[3])

),

QALY_progressive = v_pd * c(p_treatment, p_control) * c(

MGF_qaly(

GM_X1_treatment[1], GM_X1_treatment[2], GM_X1_treatment[3],

GM_X1_treatment[1]*GM_X3[1],

GM_X1_treatment[2]*GM_X3[1] + GM_X1_treatment[1]*GM_X3[2],

GM_X1_treatment[3]*GM_X3[1] + 2*GM_X1_treatment[2]*GM_X3[2] + GM_X1_treatment[1]*GM_X3[3]

),

MGF_qaly(

GM_X1_control[1], GM_X1_control[2], GM_X1_control[3],

GM_X1_control[1]*GM_X3[1],

GM_X1_control[2]*GM_X3[1] + GM_X1_control[1]*GM_X3[2],

GM_X1_control[3]*GM_X3[1] + 2*GM_X1_control[2]*GM_X3[2] + GM_X1_control[1]*GM_X3[3]

)

)

) %>% transmute(

arm = arm,

cost = cost_stable + cost_progression + cost_death + cost_progressive,

QALY = QALY_stable + QALY_progressive,

NMB = QALY * threshold - cost

)

## Discrete event simulation

# Load necessary libraries

library(dplyr)

library(flexsurv)

# [... Define parameters ...]

# Convenience function to calculate discounted QALYs

qaly <- function(a, b) {

(exp(-r*a)*((a^2*u2+a*u1+u0)*r^2 + (2*a*u2+u1)*r + 2*u2)-exp(-r*b)*((b^2*u2+b*u1+u0)*r^2 + (2*b*u2+u1)*r + 2*u2))/r^3

}

DES <- data.frame(

# Generate TTE random variables

iter = seq(1, n_DES),

X1.treatment = rweibull(n = n_DES, scale = lambda_treatment, shape = k1),

X1.control = rweibull(n = n_DES, scale = lambda_control, shape = k1),

X2 = rgompertz(n = n_DES, rate = b2, shape = a2),

X3 = rlnorm(n = n_DES, meanlog = mu3, sdlog = sigma3)

) %>% mutate(

# Calculate path through model

progressed.treatment = (X1.treatment < X2),

progressed.control = (X1.control < X2),

# Calculate time in Stable state

LY_stable.treatment = pmin(X1.treatment, X2),

LY_stable.control = pmin(X1.control, X2),

# Calculate total time

LY.treatment = if_else(progressed.treatment, X1.treatment + X3, X2),

LY.control = if_else(progressed.control, X1.control + X3, X2),

# Calculate QALYs

QALY_stable.treatment = v_sd * qaly(0, LY_stable.treatment),

QALY_stable.control = v_sd * qaly(0, LY_stable.control),

QALY_progressive.treatment = if_else(progressed.treatment, v_pd * qaly(X1.treatment, X1.treatment+X3), 0),

QALY_progressive.control = if_else(progressed.control, v_pd * qaly(X1.control, X1.control+X3), 0),

QALY.treatment = QALY_stable.treatment + QALY_progressive.treatment,

QALY.control = QALY_stable.control + QALY_progressive.control,

# Calculate cost components

cost_stable.treatment = c_treatment / r * (1 - exp(-r * LY_stable.treatment)),

cost_stable.control = c_control / r * (1 - exp(-r * LY_stable.control)),

cost_progression.treatment = if_else(progressed.treatment, c_progression*exp(-r*X1.treatment), 0),

cost_progression.control = if_else(progressed.control, c_progression*exp(-r*X1.control), 0),

cost_death.treatment = c_death * exp(-r*LY.treatment),

cost_death.control = c_death * exp(-r*LY.control),

cost_progressive.treatment = if_else(progressed.treatment, c_pd / r * (exp(-r*X1.treatment) - exp(-r*(X1.treatment+X3))), 0),

cost_progressive.control = if_else(progressed.control, c_pd / r * (exp(-r*X1.control) - exp(-r*(X1.control+X3))), 0),

# Calculate total costs

cost.treatment = cost_stable.treatment + cost_progression.treatment + cost_death.treatment + cost_progressive.treatment,

cost.control = cost_stable.control + cost_progression.control + cost_death.control + cost_progressive.control

)

## Markov cohort simulation

# Load necessary libraries

library(heemod)

library(tidyverse)

# Function to prepare Markov model for given cycle length and tunnel

# state limit

prep_MM <- function(.cycle_length, .state_time_limit) {

lst(

cycle_length = .cycle_length,

state_time_limit = .state_time_limit,

par_mod = define_parameters(

# Model parameters

dr_annual = 0.035,

cycle_length = .cycle_length,

dr = rescale_discount_rate(dr_annual, 1, cycle_length),

model_years = (model_time - 1) * cycle_length,

u0 = 0.95,

u1_abs = 0.002,

u1 = -u1_abs,

u2_abs = 0.0005,

u2 = -u2_abs,

v_sd = 0.9,

v_pd = 0.6,

c_treatment = 480,

c_control = 200,

c_progression = 3000,

c_death = 5000,

c_pd = 1000,

lambda_control = 1.5,

hr_treatment = 0.56,

k1 = 2,

lambda_treatment = lambda_control * hr_treatment ^ (-1 / k1),

a2 = 0.4,

b2 = 0.1,

mu3 = 0,

sigma3 = 1,

# Cumulative hazard of progression

CumHaz_progress_control_now = ((markov_cycle - 1) * cycle_length / lambda_control) ^

k1,

CumHaz_progress_control_next = (markov_cycle * cycle_length / lambda_control) ^

k1,

CumHaz_progress_control_incr = CumHaz_progress_control_next - CumHaz_progress_control_now,

CumHaz_progress_treatment_now = ((markov_cycle - 1) * cycle_length / lambda_treatment) ^

k1,

CumHaz_progress_treatment_next = (markov_cycle * cycle_length / lambda_treatment) ^

k1,

CumHaz_progress_treatment_incr = CumHaz_progress_treatment_next - CumHaz_progress_treatment_now,

# Cumulative hazard of death

CumHaz_death_stable_now = b2 / a2 * (exp(a2 * (markov_cycle - 1) * cycle_length) - 1),

CumHaz_death_stable_next = b2 / a2 * (exp(a2 * markov_cycle * cycle_length) - 1),

CumHaz_death_stable_incr = CumHaz_death_stable_next - CumHaz_death_stable_now,

CumHaz_sum_control = CumHaz_progress_control_incr + CumHaz_death_stable_incr,

CumHaz_sum_treatment = CumHaz_progress_treatment_incr + CumHaz_death_stable_incr,

# Transition probabilities

p_remain_stable_control = exp(-CumHaz_sum_control),

p_remain_stable_treatment = exp(-CumHaz_sum_treatment),

p_progress_control = if_else(

CumHaz_sum_control > 0,

CumHaz_progress_control_incr / CumHaz_sum_control *

(1 - exp(-CumHaz_sum_control)),

0

),

p_progress_treatment = if_else(

CumHaz_sum_treatment > 0,

CumHaz_progress_treatment_incr / CumHaz_sum_treatment *

(1 - exp(-CumHaz_sum_treatment)),

0

),

p_death_stable_control = if_else(

CumHaz_sum_control > 0,

CumHaz_death_stable_incr / CumHaz_sum_control *

(1 - exp(-CumHaz_sum_control)),

0

),

p_death_stable_treatment = if_else(

CumHaz_sum_treatment > 0,

CumHaz_death_stable_incr / CumHaz_sum_treatment *

(1 - exp(-CumHaz_sum_treatment)),

0

),

p_death_progressive = define_survival(

distribution = "lnorm",

meanlog = mu3,

sdlog = sigma3

) %>% compute_surv(time = state_time, cycle_length = cycle_length)

),

# Transition matrix in control arm

mat_control = define_transition(

state_names = c("stable", "progressive", "death"),

p_remain_stable_control, p_progress_control, p_death_stable_control,

0, C, p_death_progressive,

0, 0, 1

),

# Transition matrix in treatment arm

mat_treatment = define_transition(

state_names = c("stable", "progressive", "death"),

p_remain_stable_treatment, p_progress_treatment, p_death_stable_treatment,

0, C, p_death_progressive,

0, 0, 1

),

# Stable state payoffs

state_stable = define_state(

cost_undisc = cycle_length * dispatch_strategy(control = c_control,

treatment = c_treatment),

QALY_undisc = cycle_length * v_sd *

(u0 + u1 * model_years + u2 * model_years ^ 2),

cost = discount(cost_undisc, r = dr),

QALY = discount(QALY_undisc, r = dr)

),

# Progressive state payoffs

state_progressive = define_state(

cost_undisc = cycle_length * c_pd + if_else(state_time == 1, c_progression, 0),

QALY_undisc = cycle_length * v_pd *

(u0 + u1 * model_years + u2 * model_years ^ 2),

cost = discount(cost_undisc, r = dr),

QALY = discount(QALY_undisc, r = dr)

),

# Death state payoffs

state_death = define_state(

cost_undisc = if_else(state_time == 1, c_death, 0),

QALY_undisc = 0,

cost = discount(cost_undisc, r = dr),

QALY = discount(QALY_undisc, r = dr)

),

# Description of control arm

strat_control = define_strategy(

transition = mat_control,

stable = state_stable,

progressive = state_progressive,

death = state_death

),

# Description of treatment arm

strat_treatment = define_strategy(

transition = mat_treatment,

stable = state_stable,

progressive = state_progressive,

death = state_death

),

# Model characteristics

time_horizon = 20,

cycles = ceiling(time_horizon / .cycle_length)

)

}

# Function to run a Markov model which has been prepared

do_MM <- function(prep) {

res_mod <- run_model(

parameters = prep$par_mod,

control = prep$strat_control,

treatment = prep$strat_treatment,

init = c(1, 0, 0),

cycles = prep$cycles,

cost = cost,

effect = QALY,

state_time_limit = c(

progressive = min(prep$state_time_limit, prep$cycles),

death = 1

),

method = "life-table"

)

res_mod_summary <- summary(res_mod, threshold = 20000)

return(

res_mod_summary$res_values %>%

select(arm = .strategy_names, cost, QALY) %>%

mutate(NMB = QALY*20000 - cost))

}

prep <- prep_MM(1/12, 24)

results <- do_MM(prep)

## Markov microsimulation

# Load necessary libraries

library(tidyverse)

library(flexsurv)

# [... Define parameters ...]

# Multinomial sampling [Krijkamp et al. 2018]

samplev <- function(probs, m) {

d <- dim(probs)

n <- d[1]

k <- d[2]

lev <- dimnames(probs)[[2]]

if (!length(lev))

lev <- 1:k

ran <- matrix(lev[1], ncol = m, nrow = n)

U <- t(probs)

for (i in 2:k) {

U[i, ] <- U[i, ] + U[i - 1, ]

}

if (any((U[k, ] - 1) > 1e-05))

stop("error in multinom: probabilities do not sum to 1")

for (j in 1:m) {

un <- rep(runif(n), rep(k, n))

ran[, j] <- lev[1 + colSums(un > U)]

}

ran

}

# Function to run the microsimulation [adapted from Krijkamp et al. 2018]

# Modifications:

# - Remove function arguments and rely on bindings being provided in

# environment (certain variables/functions were already treated this

# way)

# - Call Probs with 'dur' to allow sojourn time-dependent transition

# probabilities

# - Call Costs with 'dur' to allow sojourn time-dependent costs

# - Call Effs with 't' to allow wall time-dependent utility

# - Calculate 'dur' as time in current state (not time in any disease

# state)

MicroSim <- function(TR.out = TRUE, TS.out = TRUE, Trt = FALSE, seed = 1) {

# TR.out: should the output include a Microsimulation trace? (default is TRUE)

# TS.out: should the output include a matrix of transitions between states? (default is TRUE)

# Trt: are the n.i individuals receiving treatment? (scalar with a Boolean value, default is FALSE)

# seed: starting seed number for random number generator (default is 1)

# Calculate the cost and QALY discount rates

v.dwc <- 1 / (1 + d.c) ^ (0:n.t)

v.dwe <- 1 / (1 + d.e) ^ (0:n.t)

# Create the matrix capturing the state name/costs/health outcomes for all individuals at each time point

m.M <- m.C <- m.E <- matrix(

nrow = n.i,

ncol = n.t + 1,

dimnames = list(paste("ind", 1:n.i, sep = " "),

paste("cycle", 0:n.t, sep = " "))

)

# Initial health state

m.M[, 1] <- v.M_1

# Set the seed for every individual for the random number generator

set.seed(seed)

# create the dur variable that stores the number of cycles the individual has occupied the current state

# all individuals spend one cycle in the starting state

dur <- rep(1, n.i)

# estimate costs and QALYs per individual for the initial health state

m.C[, 1] <- Costs(m.M[, 1], dur, Trt)

m.E[, 1] <- Effs (m.M[, 1], 0, Trt)

for (t in 1:n.t) {

# calculate the transition probabilities at cycle t

m.p <- Probs(m.M[, t], dur, Trt)

# sample the next health state and store that state in matrix m.M

m.M[, t + 1] <- samplev(prob = m.p, m = 1)

# Increment dur if stayed in the same state, or set to 1 if moved state

remained <- m.M[, t + 1] == m.M[, t]

dur[remained] <- dur[remained] + 1

dur[!remained] <- 1

# estimate costs and QALYs per individual during cycle t + 1 conditional on treatment

m.C[, t + 1] <- Costs(m.M[, t + 1], dur, Trt)

m.E[, t + 1] <- Effs(m.M[, t + 1], t, Trt)

# display the progress of the simulation

cat('\r', paste(round(t / n.t * 100), "% done", sep = " "))

}

# total (discounted) cost and QALYs per individual

tc <- m.C %*% v.dwc

te <- m.E %*% v.dwe

# average (discounted) cost and QALYs

tc_hat <- mean(tc)

te_hat <- mean(te)

if (TS.out == TRUE) {

# create a matrix of transitions across states

TS <- paste(m.M, cbind(m.M[, -1], NA), sep = "->")

TS <- matrix(TS, nrow = n.i)

# name the rows and columns

rownames(TS) <- paste("Ind", 1:n.i, sep = " ")

colnames(TS) <- paste("Cycle", 0:n.t, sep = " ")

} else {

TS <- NULL

}

if (TR.out == TRUE) {

TR <- t(apply(m.M, 2, function(x)

table(factor(

x, levels = v.n, ordered = TRUE

))))

# create a distribution trace

TR <- TR / n.i

# name the rows and columns

rownames(TR) <- paste("Cycle", 0:n.t, sep = " ")

colnames(TR) <- v.n

} else {

TR <- NULL

}

results <- list(

m.M = m.M,

m.C = m.C,

m.E = m.E,

tc = tc,

te = te,

tc_hat = tc_hat,

te_hat = te_hat,

TS = TS,

TR = TR

)

return(results) # return the results

}

# Function to calculate transition probabilities for all individuals

Probs <- function(M_it, dur, Trt) {

# M_it: health state occupied by individual i at cycle t (character variable)

# dur: the duration spent in the current state

# Trt: whether patient is receiving Treatment (as opposed to Control)

# create vector of state transition probabilities

m.p.it <- matrix(NA, n.s, n.i)

# assign names to the vector

rownames(m.p.it) <- v.n

# Calculate delta cumulative hazards

# Stable to Progressive

H.SP <-

pweibull(

q = (dur[M_it == "Stable"]-1)*cl,

scale = Trt*lambda_treatment + (1-Trt)*lambda_control,

shape = k1,

lower.tail = FALSE,

log.p = TRUE) -

pweibull(

q = dur[M_it == "Stable"]*cl,

scale = Trt*lambda_treatment + (1-Trt)*lambda_control,

shape = k1,

lower.tail = FALSE,

log.p = TRUE)

# Stable to Dead

H.SD <-

pgompertz(

q = (dur[M_it == "Stable"]-1)*cl,

shape = a2,

rate = b2,

lower.tail = FALSE,

log.p = TRUE) -

pgompertz(

q = dur[M_it == "Stable"]*cl,

shape = a2,

rate = b2,

lower.tail = FALSE,

log.p = TRUE)

# Progressive to Dead

H.PD <-

plnorm(

q = (dur[M_it == "Progressive"]-1)*cl,

meanlog = mu3,

sdlog = sigma3,

lower.tail = FALSE,

log.p = TRUE) -

plnorm(

q = dur[M_it == "Progressive"]*cl,

meanlog = mu3,

sdlog = sigma3,

lower.tail = FALSE,

log.p = TRUE)

# Probabilities leaving Stable

H.S <- H.SP + H.SD

p.SS <- exp(-H.S)

p.SP <- H.SP/H.S * (1 - exp(-H.S))

p.SD <- H.SD/H.S * (1 - exp(-H.S))

# Probabilities leaving progressive

p.PP <- exp(-H.PD)

p.PD <- 1 - exp(-H.PD)

# update the v.p with the appropriate probabilities

m.p.it[, M_it == "Stable"] <- rbind(p.SS, p.SP, p.SD)

m.p.it[, M_it == "Progressive"] <- rbind(0, p.PP, p.PD)

m.p.it[, M_it == "Dead"] <- c(0, 0, 1)

ifelse(colSums(m.p.it) == 1,

return(t(m.p.it)),

print("Probabilities do not sum to 1")) # return the transition probabilities or produce an error

}

# Function to calculate costs across all individuals

Costs <- function(M_it, dur, Trt = FALSE) {

# M_it: health state occupied by individual i at cycle t (character variable)

# dur: the duration spent in the current state

# Trt: is the individual being treated? (default is FALSE)

c.it <- rep(0, length(M_it))

if (any(M_it == "Stable"))

c.it[M_it == "Stable"] <- cl * (Trt*c_treatment + (1-Trt)*c_control)

if (any(M_it == "Progressive"))

c.it[M_it == "Progressive"] <- c_progression * (dur[M_it == "Progressive"] == 1) + cl * c_pd

if (any(M_it == "Dead"))

c.it[M_it == "Dead"] <- c_death * (dur[M_it == "Dead"] == 1)

return(c.it)

}

# Function to calculate QALYs across all individuals

Effs <- function(M_it, t, Trt = FALSE) {

# M_it: health state occupied by individual i at cycle t (character variable)

# t: the current cycle

# Trt: is the individual treated? (default is FALSE)

u.baseline <- u0 + u1 * ((t + 0.5) * cl) + u2 * ((t + 0.5) * cl) ** 2

u.it <- rep(0, length(M_it))

u.it[M_it == "Stable"] <- u.baseline * v_sd

u.it[M_it == "Progressive"] <- u.baseline * v_pd

u.it[M_it == "Dead"] <- 0

# calculate the QALYs during cycle t

QALYs <- u.it * cl

return(QALYs)

}

# Function factory

# Returns a function with all necessary parameters in a suitable

# environment

prep_MarkovMicrosim <- function(params, n_microsim, cycle_length) {

e <- new.env(parent = globalenv())

e$n.i <- n_microsim

e$n.t <- floor(20 / cycle_length)

e$cl <- cycle_length

e$v.n <- c("Stable", "Progressive", "Dead")

e$n.s <- length(e$v.n)

e$v.M_1 <- rep("Stable", e$n.i)

e$d.c <- e$d.e <- (1 + params$dr) ** cycle_length - 1

e$v.Trt <- c("Control", "Treatment")

# Copy over parameters

e <- list2env(params, e)

l_MicroSim <- MicroSim

e$Probs <- Probs

e$Costs <- Costs

e$Effs <- Effs

environment(l_MicroSim) <- e

environment(e$Probs) <- e

environment(e$Costs) <- e

environment(e$Effs) <- e

return(l_MicroSim)

}

# Perform the microsimulation given a function from the function

# factory and combine results for control and treatment arms

do_MarkovMicrosim <- function(microsim) {

control <- microsim(TR.out = FALSE, TS.out = FALSE, Trt = FALSE, seed = 1)

treatment <- microsim(TR.out = FALSE, TS.out = FALSE, Trt = TRUE, seed = 1)

return(

bind_rows(

tibble(arm = "Control", costs = as.vector(control$tc), QALYs = as.vector(control$te)),

tibble(arm = "Treatment", costs = as.vector(treatment$tc), QALYs = as.vector(treatment$te))

)

)

}

results <- do_MarkovMicrosim(prep_MarkovMicrosim(meanParams, 100000, 1/12))
